# Supplementary material for: New players in the same old game: a system level in silico study to predict type III secretion system and effector proteins in bacterial genomes reveals common themes in T3SS mediated pathogenesis
Source: PubMed Central journal article supplement (PMC3734048; doi:10.1186/1756-0500-6-297), 2013-07-26
Supplement: 1756-0500-6-297-S2.pdf [file 1756-0500-6-297-S2.pdf]

## **Legends to supplementary figures and tables:**

**Supplementary figure 1.** Phylogram of the 85 unique T3SS positive species based on the multiple sequence alignment of YscN, the most conserved T3SS component.

**Supplementary table 1.** List of T3SS positive bacteria predicted in this study. It includes 152 unique serovars, 85 unique genera and 43 unique species. The newly identified bacteria are shown in gray shade.

**Supplementary table 2.** Biochemical and physiological functions of the effectors. Four major classes are shown in different background colours. Effectors, which regulate the Rho GTPase, its downstream molecules or actin polymerization/de-polarization are shown with yellow background. Effectors with Cysteine protease activity are shown with cyan background. Effectors which modulate host cell function by ubiquitination of host factors are highlighted in magenta. Phosphatases are shown in dark green background. 'NA' implies the non-availability of data for a given effector.

**Supplementary table 3.** Effector matrix for 152 T3SS positive bacteria. '1' implies presence of a particular effector in a given bacterium and '0' implies its absence. The plant specific effectors are shown in green background, whereas the animal specific effectors are shown in yellow background. Effectors associated with the intracellular bacteria are shown underlined.

**Supplementary table 4.** Frequency table for the effectors. The number represents in how many unique species and genera the homologues of an effector have been predicted to be present. Blank space against any effector implies its presence in only one bacterium. The numbers in the parenthesis indicates the number of bacteria in the background dataset which contain homologues of a given effector.

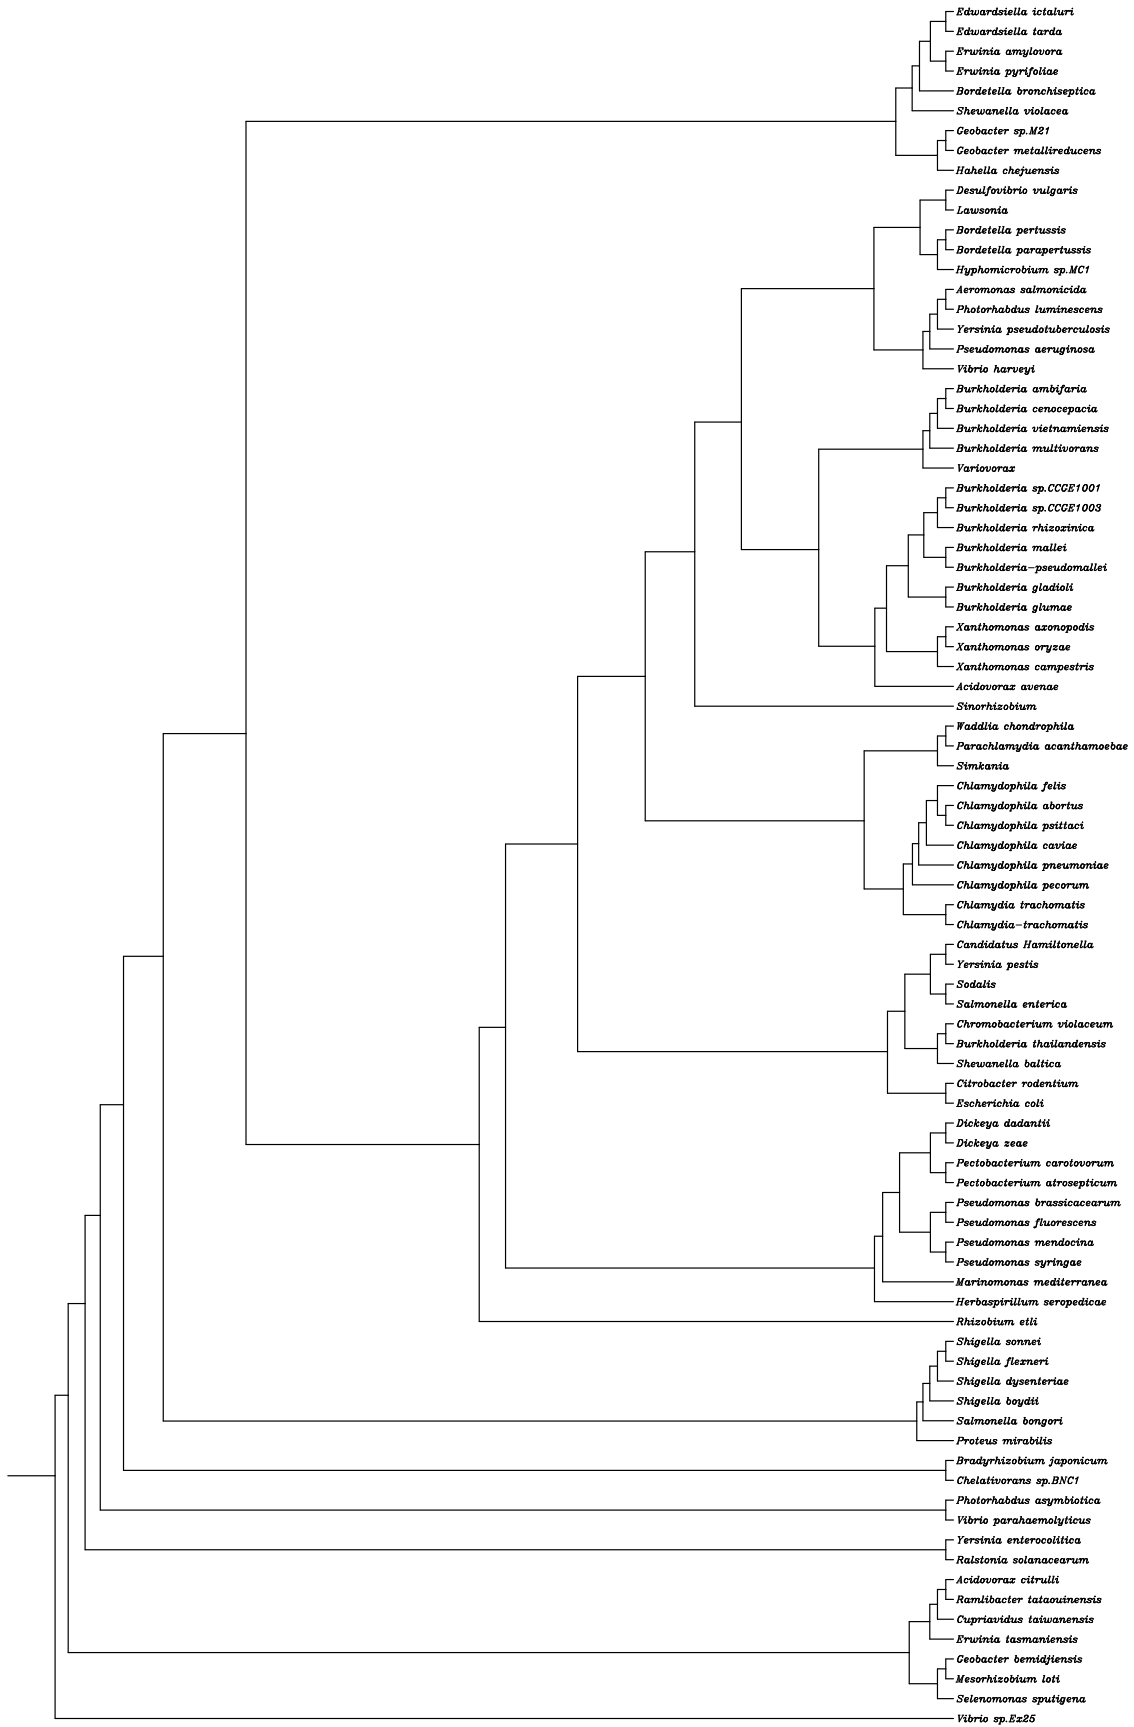

**Supplementary table 1**

| <b>Serovar</b>                                          | <b>Species</b>              | <b>Genera</b>   |
|---------------------------------------------------------|-----------------------------|-----------------|
| Acidovorax avenae ATCC 19860                            | Acidovorax avenae           | Acidovorax      |
| Acidovorax citrulli AAC00 1                             | Acidovorax citrulli         | Aeromonas       |
| Aeromonas salmonicida A449                              | Aeromonas salmonicida       | Bordetella      |
| Bordetella bronchiseptica RB50                          | Bordetella bronchiseptica   | Bradyrhizobium  |
| Bordetella parapertussis 12822                          | Bordetella parapertussis    | Burkholderia    |
| Bordetella pertussis Tohama I                           | Bordetella pertussis        | Candidatus      |
| Bradyrhizobium japonicum USDA 110                       | Bradyrhizobium japonicum    | Chelativorans   |
| Burkholderia ambifaria AMMD                             | Burkholderia ambifaria      | Chlamydophila   |
| Burkholderia ambifaria MC40 6                           | Burkholderia CCGE1001       | Chromobacterium |
| Burkholderia cenocepacia AU 1054                        | Burkholderia CCGE1003       | Citrobacter     |
| Burkholderia cenocepacia HI2424                         | Burkholderia cenocepacia    | Cupriavidus     |
| Burkholderia cenocepacia J2315                          | Burkholderia gladioli       | Desulfovibrio   |
| Burkholderia cenocepacia MC0 3                          | Burkholderia glumae         | Dickeya         |
| Burkholderia gladioli BSR3                              | Burkholderia mallei         | Edwardsiella    |
| Burkholderia glumae BGR1                                | Burkholderia multivorans    | Erwinia         |
| Burkholderia mallei ATCC 23344                          | Burkholderia pseudomallei   | Escherichia     |
| Burkholderia mallei NCTC 10229                          | Burkholderia rhizoxinica    | Geobacter       |
| Burkholderia mallei NCTC 10247                          | Burkholderia thailandensis  | Hahella         |
| Burkholderia multivorans ATCC 17616                     | Burkholderia vietnamiensis  | Herbaspirillum  |
| Burkholderia pseudomallei 1106a                         | Candidatus Hamiltonella     | Hyphomicrobium  |
| Burkholderia pseudomallei 1710b                         | Chelativorans BNC1/         | Lawsonia        |
| Burkholderia pseudomallei 668                           | Chlamydophila abortus       | Marinomonas     |
| Burkholderia pseudomallei K96243                        | Chlamydophila caviae        | Mesorhizobium   |
| Burkholderia rhizoxinica HKI 454                        | Chlamydophila felis         | Parachlamydia   |
| Burkholderia CCGE1001                                   | Chlamydophila pecorum       | Pectobacterium  |
| Burkholderia CCGE1003                                   | Chlamydophila pneumoniae    | Photobacterium  |
| Burkholderia thailandensis E264                         | Chlamydophila psittaci      | Proteus         |
| Burkholderia vietnamiensis G4                           | Chromobacterium violaceum   | Pseudomonas     |
| Candidatus Hamiltonella defensa 5AT Acyrthosiphon pisum | Citrobacter rodentium       | Ralstonia       |
| Chelativorans BNC1/                                     | Cupriavidus taiwanensis     | Ramlibacter     |
| Chlamydophila abortus S26 3                             | Desulfovibrio vulgaris      | Rhizobium       |
| Chlamydophila caviae GPIC                               | Dickeya dadantii            | Salmonella      |
| Chlamydophila felis Fe C 56                             | Dickeya zeae                | Selenomonas     |
| Chlamydophila pecorum E58                               | Edwardsiella ictaluri       | Shewanella      |
| Chlamydophila pneumoniae AR39                           | Edwardsiella tarda          | Shigella        |
| Chlamydophila pneumoniae CWL029                         | Erwinia amylovora           | Simkania        |
| Chlamydophila pneumoniae J138                           | Erwinia pyrifoliae          | Sinorhizobium   |
| Chlamydophila pneumoniae TW 183                         | Erwinia tasmaniensis        | Sodalis         |
| Chlamydophila psittaci 6BC                              | Escherichia coli            | Variovorax      |
| Chromobacterium violaceum ATCC 12472                    | Geobacter bemidjensis       | Vibrio          |
| Citrobacter rodentium ICC168                            | Geobacter M21               | Waddlia         |
| Cupriavidus taiwanensis LMG 19424                       | Geobacter metallireducens   | Xanthomonas     |
| Desulfovibrio vulgaris Hildenborough                    | Hahella chejuensis          | Yersinia        |
| Desulfovibrio vulgaris Miyazaki F                       | Herbaspirillum seropedicae  |                 |
| Desulfovibrio vulgaris DP4                              | Hyphomicrobium MC1          |                 |
| Dickeya dadantii 3937                                   | Lawsonia intracellularis    |                 |
| Dickeya dadantii Ech586                                 | Marinomonas mediterranea    |                 |
| Dickeya zeae Ech1591                                    | Mesorhizobium loti          |                 |
| Edwardsiella ictaluri 93 146                            | Parachlamydia acanthamoebae |                 |

|                                                        |                             |  |
|--------------------------------------------------------|-----------------------------|--|
| Edwardsiella tarda EIB202                              | Pectobacterium atrosepticum |  |
| Erwinia amylovora ATCC 49946                           | Pectobacterium carotovorum  |  |
| Erwinia amylovora CFBP1430                             | Photobacterium asymbiotica  |  |
| Erwinia pyrifoliae Ep1 96                              | Photobacterium luminescens  |  |
| Erwinia tasmaniensis Et1 99                            | Proteus mirabilis           |  |
| Escherichia coli 55989                                 | Pseudomonas aeruginosa      |  |
| Escherichia coli E24377A                               | Pseudomonas brassicacearum  |  |
| Escherichia coli IA11                                  | Pseudomonas fluorescens     |  |
| Escherichia coli O103 H2 12009                         | Pseudomonas mendocina       |  |
| Escherichia coli O111 H 11128                          | Pseudomonas syringae        |  |
| Escherichia coli O127 H6 E2348 69                      | Ralstonia solanacearum      |  |
| Escherichia coli O157 H7 EC4115                        | Ramlibacter tataouinensis   |  |
| Escherichia coli O157 H7 EDL933                        | Rhizobium etli              |  |
| Escherichia coli O157 H7 Sakai                         | Salmonella bongori          |  |
| Escherichia coli O157 H7 TW14359                       | Salmonella enterica         |  |
| Escherichia coli O26 H11 11368                         | Selenomonas sputigena       |  |
| Escherichia coli O55 H7 CB9615                         | Shewanella baltica          |  |
| Escherichia coli SE11                                  | Shewanella violacea         |  |
| Escherichia coli UMN026                                | Shigella boydii             |  |
| Geobacter bemidjensis Bem                              | Shigella dysenteriae        |  |
| Geobacter metallireducens GS 15                        | Shigella flexneri           |  |
| Geobacter M21                                          | Shigella sonnei             |  |
| Hahella chejuensis KCTC 2396                           | Simkania negevensis         |  |
| Herbaspirillum seropedicae SmR1                        | Sinorhizobium fredii        |  |
| Hyphomicrobium MC1                                     | Sodalis glossinidius        |  |
| Lawsonia intracellularis PHE MN1 00                    | Variovorax paradoxus        |  |
| Marinomonas mediterranea MMB 1                         | Vibrio Ex25                 |  |
| Mesorhizobium loti MAFF303099                          | Vibrio harveyi              |  |
| Parachlamydia acanthamoebae UV7                        | Vibrio parahaemolyticus     |  |
| Pectobacterium atrosepticum SCR11043                   | Waddlia chondrophila        |  |
| Pectobacterium carotovorum PC1                         | Xanthomonas axonopodis      |  |
| Photobacterium asymbiotica ATCC 43949                  | Xanthomonas campestris      |  |
| Photobacterium luminescens laumondii TTO1              | Xanthomonas oryzae          |  |
| Proteus mirabilis HI4320                               | Yersinia enterocolitica     |  |
| Pseudomonas aeruginosa LESB58                          | Yersinia pestis             |  |
| Pseudomonas aeruginosa PAO1                            | Yersinia pseudotuberculosis |  |
| Pseudomonas aeruginosa UCBPP PA14                      |                             |  |
| Pseudomonas brassicacearum NFM421                      |                             |  |
| Pseudomonas fluorescens SBW25                          |                             |  |
| Pseudomonas mendocina ymp                              |                             |  |
| Pseudomonas syringae phaseolicola 1448A                |                             |  |
| Pseudomonas syringae B728a                             |                             |  |
| Pseudomonas syringae tomato DC3000                     |                             |  |
| Ralstonia solanacearum GMI1000                         |                             |  |
| Ralstonia solanacearum MolK2                           |                             |  |
| Ralstonia solanacearum PSI07                           |                             |  |
| Ramlibacter tataouinensis TTB310                       |                             |  |
| Rhizobium etli CFN 42                                  |                             |  |
| Salmonella bongori NCTC 12419                          |                             |  |
| Salmonella enterica arizonae serovar 62 z4 z23 RSK2980 |                             |  |
| Salmonella enterica serovar Agona SL483                |                             |  |
| Salmonella enterica serovar Choleraesuis SC B67        |                             |  |
| Salmonella enterica serovar Dublin CT 02021853         |                             |  |
| Salmonella enterica serovar Enteritidis P125109        |                             |  |
| Salmonella enterica serovar Gallinarum 287 91          |                             |  |

|                                                     |  |  |
|-----------------------------------------------------|--|--|
| Salmonella enterica serovar Heidelberg SL476        |  |  |
| Salmonella enterica serovar Newport SL254           |  |  |
| Salmonella enterica serovar Paratyphi A AKU 12601   |  |  |
| Salmonella enterica serovar Paratyphi A ATCC 9150   |  |  |
| Salmonella enterica serovar Paratyphi B SPB7        |  |  |
| Salmonella enterica serovar Paratyphi C RKS4594     |  |  |
| Salmonella enterica serovar Schwarzengrund CVM19633 |  |  |
| Salmonella enterica serovar Typhimurium LT2         |  |  |
| Salmonella enterica serovar Typhi CT18              |  |  |
| Salmonella enterica serovar Typhi Ty2               |  |  |
| Selenomonas sputigena ATCC 35185                    |  |  |
| Shewanella baltica OS155                            |  |  |
| Shewanella baltica OS195                            |  |  |
| Shewanella violacea DSS12                           |  |  |
| Shigella boydii CDC 3083 94                         |  |  |
| Shigella dysenteriae Sd197                          |  |  |
| Shigella flexneri 2a 301                            |  |  |
| Shigella sonnei Ss046                               |  |  |
| Simkania negevensis Z                               |  |  |
| Sinorhizobium fredii NGR234                         |  |  |
| Sodalis glossinidius morsitans                      |  |  |
| Variovorax paradoxus EPS                            |  |  |
| Vibrio harveyi ATCC BAA 1116                        |  |  |
| Vibrio parahaemolyticus RIMD 2210633                |  |  |
| Vibrio Ex25                                         |  |  |
| Waddlia chondrophila WSU 86 1044                    |  |  |
| Xanthomonas axonopodis citri 306                    |  |  |
| Xanthomonas campestris 8004                         |  |  |
| Xanthomonas campestris ATCC 33913                   |  |  |
| Xanthomonas campestris B100                         |  |  |
| Xanthomonas campestris vesicatoria 85 10            |  |  |
| Xanthomonas oryzae KACC10331                        |  |  |
| Xanthomonas oryzae MAFF 311018                      |  |  |
| Xanthomonas oryzae PXO99A                           |  |  |
| Yersinia enterocolitica 8081                        |  |  |
| Yersinia enterocolitica palearctica 105 5R r        |  |  |
| Yersinia pestis Angola                              |  |  |
| Yersinia pestis Antiqua                             |  |  |
| Yersinia pestis biovar Microtus 91001               |  |  |
| Yersinia pestis CO92                                |  |  |
| Yersinia pestis Nepal516                            |  |  |
| Yersinia pestis Pestoides F                         |  |  |
| Yersinia pestis Z176003                             |  |  |
| Yersinia pseudotuberculosis IP 31758                |  |  |
| Yersinia pseudotuberculosis IP 32953                |  |  |
| Yersinia pseudotuberculosis PB1                     |  |  |
| Yersinia pseudotuberculosis YPIII                   |  |  |

**Supplementary table 2**

| <b>Name</b>  | <b>Biochemical activity</b>                                                               | <b>Biological function</b>                                                                                                    |
|--------------|-------------------------------------------------------------------------------------------|-------------------------------------------------------------------------------------------------------------------------------|
| AexT.txt     | RhoGAP                                                                                    | Cytoskeletal remodelling.                                                                                                     |
| AvrA.txt     | Cysteine protease                                                                         | Modulate the activity of JNK pathway to inhibit apoptosis.                                                                    |
| AvrBsT.txt   | Cysteine protease                                                                         | Remove sumo modification from defence related proteins in plant by protease activity.                                         |
| AvrPphB.txt  | Cysteine protease                                                                         | Remove sumo modification from defence related proteins in plant by protease activity.                                         |
| AvrPtoB.txt  | Ub ligase                                                                                 | Suppress plant resistance.                                                                                                    |
| BB4228.txt   | NA                                                                                        | NA                                                                                                                            |
| BopA.txt     | NA                                                                                        | Helps in escaping from phagosome which follows replication.                                                                   |
| BopE.txt     | Rho GEF                                                                                   | Cytoskeletal remodelling.                                                                                                     |
| BPSS1516.txt | NA                                                                                        | NA                                                                                                                            |
| BPSS1539.txt | NA                                                                                        | NA                                                                                                                            |
| Cp0034.txt   | NA                                                                                        | NA                                                                                                                            |
| EspF.txt     | Binds to SNX9 via SH3 binding motif.                                                      | Membrane remodelling by recruitment of SNX9 onto PM.                                                                          |
| EspG.txt     | Increase active population of ARF GTPase, activation of P21 activated kinase activity.    | Disruption of tight junction, inhibition of protein secretion via Golgi.                                                      |
| EspH.txt     | Binds to RhoGEF and deactivate Rho                                                        | Cytoskeletal remodelling/focal adhesion disassembly, triggers cell detachment, activates caspase-3, and induces cytotoxicity. |
| EspZ.txt     | Localizes to Mitochondria and interacts with translocase in the inner membrane            | Survival signal in host to defer the host cell death.                                                                         |
| ExoS.txt     | RhoGAP/ADP ribosylation                                                                   | Cytoskeletal remodelling/inhibits phagocytosis.                                                                               |
| ExoT.txt     | RhoGAP/ADP ribosylation                                                                   | Cytoskeletal remodelling.                                                                                                     |
| ExoU.txt     | Phospholipase                                                                             | Cytotoxic/kills epithelial and other cell types.                                                                              |
| ExoY.txt     | Adenylate cyclase                                                                         | Disrupt Cytoskeletal arrangement/inhibit phagocytosis of the bacteria into host cells.                                        |
| GALA.txt     | F box containing protein which recruits target proteins to ubiquitin conjugating proteins | F box is important for virulence.                                                                                             |
| HopptD2.txt  | Tyr Phosphatase                                                                           | Suppress plant resistance.                                                                                                    |
| HopptN.txt   | Cysteine protease                                                                         | Suppress plant resistance.                                                                                                    |
| Ibe.txt      | Binds to IQGAP                                                                            | Modulate Actin cytoskeleton and stabilizes PM pedestal for attachment of the bacteria to cell surface.                        |
| IcsB.txt     | Compete with ATG5 for VirA binding with                                                   | Modulate Autophagy.                                                                                                           |
| IncA.txt     | Intracellular development                                                                 | Inclusion body associated protein.                                                                                            |

|           |                                                                                        |                                                                                                                                                   |
|-----------|----------------------------------------------------------------------------------------|---------------------------------------------------------------------------------------------------------------------------------------------------|
|           | of Chlamydia                                                                           |                                                                                                                                                   |
| IncB.txt  | NA                                                                                     | Inclusion membrane associated protein.                                                                                                            |
| IncD.txt  | NA                                                                                     | NA                                                                                                                                                |
| IncE.txt  | NA                                                                                     | NA                                                                                                                                                |
| IncF.txt  | NA                                                                                     | NA                                                                                                                                                |
| IncG.txt  | NA                                                                                     | NA                                                                                                                                                |
| IpaA.txt  | Actin depolymerization/binds to vinculin                                               | Induce membrane ruffle by recycling Actin from stress fibre/Cytoskeletal remodelling.                                                             |
| IpaB.txt  | Activate Caspase 1                                                                     | Fragments golgi and affect cell surface receptor recycling.                                                                                       |
| IpaC.txt  | Actin polymerization by activating Src kinase and Arp2/3                               | Invasion of Shigella into epithelial cells /Cytoskeletal remodelling.                                                                             |
| IpaH.txt  | Ub ligase/ubiquitination of MAP kinas                                                  | Block innate immune response possibly by down regulating MAPKK and downstream expression involved in innate response.                             |
| Ipgb.txt  | Activate RhoG/RhoA                                                                     | Induce membrane ruffles during bacterial invasion/Cytoskeletal remodelling.                                                                       |
| IpgD.txt  | Phosphatase/ Promotes formation of PI5P from PI(4,5)P2.                                | Causes membrane blebbing.                                                                                                                         |
| LopT.txt  | Cysteine protease/                                                                     | Inhibit phagocytosis by releasing RhoA Rac from PM by protease activity/Cytoskeletal remodelling.                                                 |
| LscZ.txt  | NA                                                                                     | NA                                                                                                                                                |
| MAP.txt   | Activate CDC42                                                                         | Induces transient filopodium formation at bacterial attachment sites during the early stages of EPEC infection/Cytoskeletal remodelling.          |
| NleB.txt  | Inhibits translocation of P65 component of NF- $\kappa$ B in TNF-a mediated activation | Inhibits NF- $\kappa$ B activation.                                                                                                               |
| Orf31.txt | Activate Rho/RAC/CDC42                                                                 | Extected to modulate Cytoskeletal remodelling.                                                                                                    |
| OspC3.txt | NA                                                                                     | Post invasion virulence / helps in disruption of cell barrier and increase PMN migration through epithelial cells thereby increased inflammation. |
| OspF.txt  | Phospho Thereonine lyase, inactivate MAP kinase/ERK/JNK                                | Block innate immune response by down regulating transcription of the subset of NF- $\kappa$ B regulated genes.                                    |
| OspG.txt  | Ser/Thr Kinase/ Ubiquitination of I $\kappa$ B $\alpha$ and degradation via proteosome | Block innate immune response /repression of NF- $\kappa$ B.                                                                                       |
| PipB.txt  | Targeted to late endosomes                                                             | Inflammatory response / Most likely maturation of SCB/SIF.                                                                                        |
| PopP1.txt | Cysteine protease                                                                      | Most likely to regulate plant defence proteins. Homologue, Popp2 binds to a transcription                                                         |

|           |                                                                                              |                                                                                                                                                   |
|-----------|----------------------------------------------------------------------------------------------|---------------------------------------------------------------------------------------------------------------------------------------------------|
|           |                                                                                              | factor which regulate genes in a defence pathway.                                                                                                 |
| SifA.txt  | Activate Rho/RAC/CDC42                                                                       | Induce long Actin filaments, by getting (Fusion of endosomal compartment with the salmonella vacuole) membrane from the endosomal membrane.       |
| SipA.txt  | Actin polymerization thus slow down Actin dynamics                                           | Entry of Salmonella by inducing growth of filopodia and membrane ruffle which engulf the bacteria/Cytoskeletal rearrangement.                     |
| SipB.txt  | Caspase 1 binding                                                                            | Induce apoptosis into macrophage.                                                                                                                 |
| SipC.txt  | Nucleate Actin polymer formation and bundle in vitro                                         | Maturation of Salmonella vacuole.                                                                                                                 |
| SlrP.txt  | Binds to DNAJ(chaperone and interferes with binding to its substrate. It also ubiquitinate . | Cause accumulation of unfolded proteins in the host and alter cellular redox potential                                                            |
| SopA.txt  | Ubiquitination                                                                               | Induce inflammation.                                                                                                                              |
| SopB.txt  | Phosphatase/membrane modification                                                            | Activate Cdc42/Rac/entry into host cells/also have role in phagosome maturation/Cytoskeletal remodelling.                                         |
| SopD.txt  | Targetted to late endosomes                                                                  | Crucial for invasion, membrane fission, macro-pinosome formation                                                                                  |
| SopE.txt  | Rho GEF                                                                                      | Remodelling Cytoskeletal structure to enter host cell./ activate CDC42/Rac/entry into host cells.                                                 |
| SpiC.txt  | NA                                                                                           | Inhibits the fusion of the SCV with Lysosome. It activates MAP kinase pathway in macrophage.                                                      |
| SptP.txt  | Rho GAP                                                                                      | Seal the leak/ rebuild the Cytoskeleton as it was in the uninfected state/opposing activity of SopE/SopB.                                         |
| SseF.txt  | Salmonella maturation                                                                        | Involved in Salmonella induced filaments/bacteria proliferation.                                                                                  |
| SseG.txt  | Salmonella maturation                                                                        | Involved in Salmonella induced filaments/bacterial proliferation.                                                                                 |
| SseJ.txt  | Lipase                                                                                       | SCV biogenesis.                                                                                                                                   |
| SseL.txt  | Cysteine protease/Deubiquitination using Cysteine protease                                   | Binds to the oxysterol binding protein and recruits to SCV which plays crucial role in Salmonella replication.                                    |
| SspH1.txt | Ub ligase                                                                                    | Inhibits NF- $\kappa$ $\beta$ dependent gene expression.                                                                                          |
| TarP.txt  | Polymerize Actin in concert with Arp2/3 protein complex                                      | Internalization Chlamydia/Cytoskeletal remodelling.                                                                                               |
| TccP2.txt | Activate Wasp mediated Actin polymerization                                                  | Cytoskeletal remodelling /might play a role in attachment to the host cell.                                                                       |
| Tir.txt   | Recruits ShIP2 to promotes phosphatase.                                                      | Attachment of EPEC to host cell surface. by inducing Actin supported membrane protrusion, lamellipodia /Inhibits NF- $\kappa$ $\beta$ activation. |
| VirA.txt  | Cysteine protease/                                                                           | Microtubule degradation/Cytoskeletal                                                                                                              |



|             |                                                                                   |                                                                                                                                                                                   |
|-------------|-----------------------------------------------------------------------------------|-----------------------------------------------------------------------------------------------------------------------------------------------------------------------------------|
|             |                                                                                   | remodelling.                                                                                                                                                                      |
| VopA.txt    | Cysteine protease/acetyl transferase                                              | Acetylates a conserved lysine found in the catalytic loop of all kinases and blocks the binding of ATP, but not ADP, on the MKKs, resulting in an inactive phosphorylated kinase. |
| VopF.txt    | Inhibit Actin polymerization                                                      | Disrupt tight cell junction by de-polymerizing cortical Actin and miss-localizing Zo-1/ protects against apoptosis.                                                               |
| VopQ.txt    | Autophagy                                                                         | Inhibits phagocytosis during infection.                                                                                                                                           |
| VopS.txt    | Deactivate Rho and Rac family of GTPases by Ampylating their effectors            | Cell shape is lost, rounded up/Cytoskeletal remodelling.                                                                                                                          |
| VP1680.txt  | NA                                                                                | Activates MAP kinase pathway which in turn induces inflammation.                                                                                                                  |
| VP1683.txt  | NA                                                                                | NA                                                                                                                                                                                |
| VP1686.txt  | Activate RhoB                                                                     | Actin remodelling to increase uptake of the bacteria by macrophage.                                                                                                               |
| VP1698.txt  | NA                                                                                | NA                                                                                                                                                                                |
| VPA0450.txt | Phosphatase                                                                       | Membrane blebbing.                                                                                                                                                                |
| XopD.txt    | Cysteine protease                                                                 | XopD specifically interacts with MYB30, resulting in inhibition of the transcriptional activation of MYB30 VLCFA-related target genes and suppression of Arabidopsis defence.     |
| YopE.txt    | Rho GAP                                                                           | Deactivate Rho GTPase /helps the host cell to revert back to the normal steady state for the Cytoskeletal structure /negatively regulate effector entry into the host .           |
| YopH.txt    | Tyrosine Phosphatase                                                              | Inhibits phagocytosis by macrophage by inactivating several host proteins which initiate phagocytosis/also inhibits integrin signalling/Cytoskeletal remodelling.                 |
| YopJ.txt    | Cysteine protease/Inhibit MAPk and NF- $\kappa$ $\beta$ pathway                   | Anti inflammation activity.                                                                                                                                                       |
| YopK.txt    | NA                                                                                | Regulate effector entry into host cells from within the host cell/promotes virulence by preventing inflammasome recognition of the Type III secretion system.                     |
| YopO.txt    | Ser/thr Kinase and GDI like domain                                                | Inhibits Fc $\gamma$ receptor mediated phagocytosis sequestering Rac1/Cytoskeletal remodelling.                                                                                   |
| YopT.txt    | Cysteine protease/regulate Rho activity by cleaving the membrane bound Rho GTPase | Inhibit phagocytosis/Cytoskeletal remodelling.                                                                                                                                    |





|                           |             |             |              |             |             |             |             |             |             |             |             |             |             |             |             |             |             |             |              |             |              |
|---------------------------|-------------|-------------|--------------|-------------|-------------|-------------|-------------|-------------|-------------|-------------|-------------|-------------|-------------|-------------|-------------|-------------|-------------|-------------|--------------|-------------|--------------|
| Bordetella pertussis      | 0           | 0           | 0            | 0           | 0           | 1           | 0           | 0           | 0           | 0           | 0           | 0           | 0           | 0           | 0           | 0           | 0           | 0           | 0            | 1           | 0            |
| Candidatus Hamiltonella   | 1           | 0           | 0            | 0           | 0           | 0           | 0           | 0           | 0           | 0           | 0           | 0           | 0           | 0           | 0           | 0           | 1           | 1           | 0            | 1           | 0            |
| Chromobacterium violaceum | 0           | 0           | 0            | 0           | 0           | 0           | 0           | 0           | 0           | 1           | 0           | 0           | 0           | 0           | 0           | 0           | 0           | 0           | 0            | 0           | 0            |
| Citrobacter rodentium     | 0           | 0           | 0            | 0           | 0           | 0           | 0           | 0           | 0           | 0           | 1           | 1           | 1           | 1           | 1           | 1           | 0           | 0           | 0            | 0           | 0            |
| Cupriavidus taiwanensis   | 0           | 0           | 0            | 0           | 0           | 0           | 0           | 0           | 0           | 0           | 0           | 0           | 0           | 0           | 0           | 0           | 0           | 0           | 0            | 0           | 0            |
| Desulfovibrio vulgaris    | 0           | 0           | 0            | 0           | 0           | 0           | 0           | 0           | 0           | 0           | 0           | 0           | 0           | 0           | 0           | 0           | 0           | 0           | 0            | 0           | 0            |
| Edwardsiella tarda        | 0           | 0           | 0            | 0           | 0           | 0           | 0           | 0           | 0           | 0           | 0           | 0           | 0           | 0           | 0           | 0           | 0           | 0           | 0            | 0           | 0            |
| Geobacter bemidjiensis    | 0           | 0           | 0            | 0           | 0           | 0           | 0           | 0           | 0           | 0           | 0           | 0           | 0           | 0           | 0           | 0           | 0           | 0           | 0            | 0           | 0            |
| Geobacter M21             | 0           | 0           | 0            | 0           | 0           | 0           | 0           | 0           | 0           | 0           | 0           | 0           | 0           | 0           | 0           | 0           | 0           | 0           | 0            | 0           | 0            |
| Geobacter metallireducens | 0           | 0           | 0            | 0           | 0           | 0           | 0           | 0           | 0           | 0           | 0           | 0           | 0           | 0           | 0           | 0           | 0           | 0           | 0            | 0           | 0            |
| Hahella chejuensis        | 0           | 0           | 0            | 0           | 0           | 0           | 0           | 0           | 0           | 0           | 0           | 0           | 0           | 0           | 0           | 0           | 0           | 0           | 0            | 0           | 0            |
| Hyphomicrobium MC1        | 0           | 0           | 0            | 0           | 0           | 0           | 0           | 0           | 0           | 0           | 0           | 0           | 0           | 0           | 0           | 0           | 0           | 0           | 0            | 0           | 0            |
| Lawsonia intracellularis  | 0           | 0           | 0            | 0           | 0           | 0           | 0           | 0           | 0           | 0           | 0           | 0           | 0           | 0           | 0           | 0           | 0           | 0           | 0            | 0           | 0            |
| Photorhabdus asymbiotica  | 0           | 0           | 0            | 0           | 0           | 0           | 0           | 0           | 0           | 0           | 0           | 0           | 0           | 0           | 0           | 0           | 0           | 0           | 1            | 0           | 0            |
| Proteus mirabilis         | 0           | 0           | 0            | 0           | 0           | 0           | 0           | 0           | 0           | 0           | 0           | 0           | 0           | 0           | 0           | 0           | 0           | 0           | 0            | 0           | 0            |
| Pseudomonas mendocina     | 0           | 0           | 0            | 0           | 0           | 0           | 0           | 0           | 0           | 0           | 0           | 0           | 0           | 0           | 0           | 0           | 0           | 0           | 0            | 0           | 0            |
| Ramlibacter tataouinensis | 0           | 0           | 0            | 0           | 0           | 0           | 0           | 0           | 0           | 0           | 0           | 0           | 0           | 0           | 0           | 0           | 0           | 0           | 0            | 0           | 0            |
| Selenomonas sputigena     | 0           | 0           | 0            | 0           | 0           | 0           | 0           | 0           | 0           | 0           | 0           | 0           | 0           | 0           | 0           | 0           | 0           | 0           | 0            | 0           | 0            |
| Shewanella violacea       | 0           | 0           | 0            | 0           | 0           | 0           | 0           | 0           | 0           | 0           | 0           | 0           | 0           | 0           | 0           | 0           | 0           | 0           | 0            | 0           | 0            |
| Simkania negevensis       | 0           | 0           | 0            | 0           | 0           | 1           | 0           | 0           | 0           | 0           | 0           | 0           | 0           | 0           | 0           | 0           | 0           | 0           | 0            | 0           | 0            |
| Sodalis glossinidius      | 0           | 0           | 0            | 0           | 0           | 0           | 0           | 0           | 0           | 0           | 0           | 0           | 0           | 0           | 0           | 0           | 0           | 0           | 0            | 0           | 0            |
| Variovorax paradoxus      | 0           | 0           | 0            | 0           | 0           | 0           | 0           | 0           | 0           | 0           | 0           | 0           | 0           | 0           | 0           | 0           | 0           | 0           | 0            | 0           | 0            |
| Vibrio Ex25               | 0           | 0           | 0            | 0           | 0           | 0           | 0           | 0           | 0           | 0           | 0           | 0           | 0           | 0           | 0           | 0           | 0           | 0           | 0            | 0           | 0            |
| Vibrio harveyi            | 0           | 0           | 0            | 0           | 0           | 0           | 0           | 0           | 0           | 0           | 0           | 0           | 0           | 0           | 0           | 0           | 0           | 0           | 0            | 0           | 0            |
|                           |             |             |              |             |             |             |             |             |             |             |             |             |             |             |             |             |             |             |              |             |              |
|                           |             |             |              |             |             |             |             |             |             |             |             |             |             |             |             |             |             |             |              |             |              |
| <b>effector</b>           | <b>OspG</b> | <b>PipB</b> | <b>PopP1</b> | <b>SifA</b> | <b>SipA</b> | <b>SipB</b> | <b>SipC</b> | <b>SlrP</b> | <b>SopA</b> | <b>SopB</b> | <b>SopD</b> | <b>SopE</b> | <b>SpiC</b> | <b>SptP</b> | <b>SseF</b> | <b>SseG</b> | <b>SseJ</b> | <b>SseL</b> | <b>SspH1</b> | <b>TarP</b> | <b>TccP2</b> |
| Pseudomonas syringae      | 0           | 0           | 0            | 0           | 0           | 0           | 0           | 0           | 0           | 0           | 0           | 0           | 0           | 0           | 0           | 0           | 0           | 0           | 1            | 0           | 0            |
| Acidovorax avenae         | 0           | 0           | 1            | 0           | 0           | 0           | 0           | 0           | 0           | 0           | 0           | 0           | 0           | 0           | 0           | 0           | 0           | 0           | 0            | 0           | 0            |
| Acidovorax citrulli       | 0           | 0           | 1            | 0           | 0           | 0           | 0           | 0           | 0           | 0           | 0           | 0           | 0           | 0           | 0           | 0           | 0           | 0           | 0            | 0           | 0            |
| Erwinia amylovora         | 1           | 0           | 0            | 0           | 0           | 1           | 0           | 0           | 1           | 0           | 0           | 0           | 0           | 1           | 0           | 0           | 0           | 0           | 0            | 0           | 0            |
| Erwinia pyrifoliae        | 0           | 0           | 0            | 0           | 0           | 0           | 0           | 0           | 1           | 0           | 0           | 0           | 0           | 1           | 0           | 0           | 0           | 0           | 0            | 0           | 0            |
| Ralstonia solanacearum    | 0           | 0           | 1            | 0           | 0           | 0           | 0           | 0           | 0           | 0           | 0           | 0           | 0           | 0           | 0           | 0           | 0           | 0           | 1            | 0           | 0            |







|                             |   |   |   |   |   |   |   |   |   |   |   |   |   |   |   |   |   |   |   |   |   |
|-----------------------------|---|---|---|---|---|---|---|---|---|---|---|---|---|---|---|---|---|---|---|---|---|
| Pseudomonas brassicacearum  | 0 | 0 | 0 | 0 | 0 | 0 | 0 | 0 | 0 | 0 | 0 | 0 | 0 | 0 | 0 | 0 | 0 | 0 | 0 | 0 | 0 |
| Pseudomonas fluorescens     | 0 | 0 | 0 | 0 | 0 | 0 | 0 | 0 | 0 | 0 | 0 | 0 | 0 | 0 | 0 | 0 | 0 | 0 | 0 | 1 | 0 |
| Rhizobium etli              | 0 | 0 | 0 | 0 | 0 | 0 | 0 | 0 | 0 | 0 | 0 | 0 | 0 | 0 | 0 | 0 | 0 | 0 | 0 | 0 | 0 |
| Xanthomonas axonopodis      | 0 | 0 | 0 | 0 | 0 | 0 | 0 | 0 | 0 | 0 | 0 | 0 | 0 | 0 | 0 | 0 | 0 | 0 | 0 | 0 | 0 |
| Xanthomonas oryzae          | 0 | 0 | 0 | 0 | 0 | 0 | 0 | 0 | 0 | 0 | 0 | 0 | 0 | 0 | 0 | 0 | 0 | 0 | 0 | 0 | 0 |
| Salmonella bongori          | 0 | 0 | 0 | 0 | 0 | 0 | 0 | 0 | 0 | 1 | 1 | 1 | 0 | 1 | 0 | 0 | 0 | 0 | 0 | 1 | 0 |
| Salmonella enterica         | 0 | 0 | 0 | 0 | 0 | 0 | 0 | 0 | 0 | 1 | 1 | 1 | 0 | 1 | 0 | 0 | 0 | 0 | 1 | 0 | 1 |
| Yersinia enterocolitica     | 0 | 0 | 0 | 0 | 0 | 0 | 0 | 0 | 0 | 0 | 0 | 0 | 0 | 0 | 0 | 1 | 0 | 0 | 0 | 0 | 0 |
| Yersinia pestis             | 0 | 0 | 0 | 0 | 0 | 0 | 0 | 0 | 0 | 0 | 0 | 0 | 0 | 0 | 0 | 1 | 0 | 0 | 0 | 0 | 0 |
| Yersinia pseudotuberculosis | 0 | 0 | 0 | 0 | 0 | 0 | 0 | 0 | 0 | 0 | 0 | 0 | 0 | 0 | 0 | 1 | 0 | 0 | 0 | 0 | 0 |
| Burkholderia ambifaria      | 0 | 0 | 0 | 0 | 0 | 0 | 0 | 0 | 0 | 0 | 0 | 0 | 0 | 0 | 0 | 0 | 0 | 0 | 0 | 0 | 0 |
| Burkholderia CCGE1001       | 0 | 0 | 0 | 0 | 0 | 0 | 0 | 0 | 0 | 0 | 0 | 0 | 0 | 0 | 0 | 0 | 0 | 0 | 0 | 0 | 0 |
| Burkholderia CCGE1003       | 0 | 0 | 0 | 0 | 0 | 0 | 0 | 0 | 0 | 0 | 0 | 0 | 0 | 0 | 0 | 0 | 0 | 0 | 0 | 0 | 0 |
| Burkholderia cenocepacia    | 0 | 0 | 0 | 0 | 0 | 0 | 0 | 0 | 0 | 0 | 0 | 0 | 0 | 0 | 0 | 0 | 0 | 0 | 0 | 0 | 0 |
| Burkholderia gladioli       | 0 | 0 | 0 | 0 | 0 | 0 | 0 | 0 | 0 | 0 | 0 | 0 | 0 | 0 | 0 | 0 | 0 | 0 | 0 | 0 | 0 |
| Burkholderia glumae         | 0 | 0 | 0 | 0 | 0 | 0 | 0 | 0 | 0 | 0 | 0 | 0 | 0 | 0 | 0 | 0 | 0 | 0 | 0 | 0 | 0 |
| Burkholderia mallei         | 0 | 0 | 1 | 0 | 0 | 0 | 0 | 0 | 0 | 0 | 1 | 0 | 0 | 0 | 0 | 0 | 0 | 0 | 0 | 0 | 0 |
| Burkholderia multivorans    | 0 | 0 | 0 | 0 | 0 | 0 | 0 | 0 | 0 | 0 | 0 | 0 | 0 | 0 | 0 | 0 | 0 | 0 | 0 | 0 | 0 |
| Burkholderia pseudomallei   | 0 | 0 | 1 | 0 | 0 | 0 | 0 | 0 | 0 | 0 | 1 | 0 | 0 | 0 | 0 | 0 | 0 | 0 | 0 | 0 | 0 |
| Burkholderia rhizoxinica    | 0 | 0 | 0 | 0 | 0 | 0 | 0 | 0 | 0 | 0 | 0 | 0 | 0 | 0 | 0 | 0 | 0 | 0 | 0 | 0 | 0 |
| Burkholderia thailandensis  | 0 | 0 | 1 | 0 | 0 | 0 | 0 | 0 | 0 | 0 | 1 | 0 | 0 | 0 | 0 | 0 | 0 | 0 | 0 | 0 | 0 |
| Burkholderia vietnamiensis  | 0 | 0 | 0 | 0 | 0 | 0 | 0 | 0 | 0 | 0 | 0 | 0 | 0 | 0 | 0 | 0 | 0 | 0 | 0 | 0 | 0 |
| Chlamydophila abortus       | 0 | 0 | 0 | 0 | 1 | 0 | 0 | 0 | 0 | 0 | 0 | 0 | 0 | 0 | 0 | 0 | 0 | 0 | 0 | 0 | 0 |
| Chlamydophila caviae        | 0 | 0 | 0 | 0 | 1 | 0 | 0 | 0 | 0 | 0 | 0 | 0 | 0 | 0 | 0 | 0 | 0 | 0 | 0 | 0 | 0 |
| Chlamydophila felis         | 0 | 0 | 0 | 0 | 1 | 0 | 0 | 0 | 0 | 0 | 0 | 0 | 0 | 0 | 0 | 0 | 0 | 0 | 0 | 0 | 0 |
| Chlamydophila pecorum       | 0 | 0 | 0 | 0 | 0 | 0 | 0 | 0 | 0 | 0 | 0 | 0 | 0 | 0 | 0 | 0 | 0 | 0 | 0 | 0 | 0 |
| Chlamydophila pneumoniae    | 0 | 0 | 0 | 0 | 1 | 0 | 0 | 0 | 0 | 0 | 0 | 0 | 0 | 0 | 0 | 0 | 0 | 0 | 0 | 0 | 0 |
| Chlamydophila psittaci      | 0 | 0 | 0 | 0 | 0 | 0 | 0 | 0 | 0 | 0 | 0 | 0 | 0 | 0 | 0 | 0 | 0 | 0 | 0 | 0 | 0 |
| Pseudomonas aeruginosa      | 0 | 0 | 0 | 0 | 0 | 0 | 0 | 0 | 0 | 0 | 0 | 0 | 0 | 0 | 0 | 0 | 1 | 0 | 0 | 0 | 0 |
| Shigella boydii             | 0 | 0 | 1 | 0 | 0 | 0 | 0 | 0 | 0 | 1 | 1 | 1 | 1 | 1 | 1 | 0 | 0 | 1 | 0 | 1 | 1 |
| Shigella dysenteriae        | 0 | 0 | 1 | 0 | 0 | 0 | 0 | 0 | 0 | 1 | 1 | 1 | 1 | 1 | 1 | 0 | 0 | 1 | 0 | 1 | 1 |
| Shigella flexneri           | 0 | 0 | 1 | 0 | 0 | 0 | 0 | 0 | 0 | 1 | 1 | 1 | 1 | 1 | 1 | 0 | 0 | 1 | 0 | 1 | 1 |





|                             |            |               |               |               |               |             |             |             |             |             |             |             |             |             |             |             |             |               |            |              |                |
|-----------------------------|------------|---------------|---------------|---------------|---------------|-------------|-------------|-------------|-------------|-------------|-------------|-------------|-------------|-------------|-------------|-------------|-------------|---------------|------------|--------------|----------------|
| Sodalis glossinidius        | 0          | 0             | 0             | 0             | 0             | 0           | 0           | 0           | 0           | 0           | 1           | 0           | 0           | 1           | 0           | 0           | 0           | 0             | 0          | 0            | 0              |
| Variovorax paradoxus        | 0          | 0             | 0             | 0             | 0             | 0           | 0           | 0           | 0           | 0           | 0           | 0           | 0           | 0           | 0           | 0           | 0           | 0             | 0          | 0            | 0              |
| Vibrio Ex25                 | 0          | 0             | 0             | 0             | 0             | 0           | 0           | 0           | 0           | 0           | 0           | 0           | 0           | 0           | 0           | 0           | 0           | 0             | 0          | 0            | 0              |
| Vibrio harveyi              | 0          | 0             | 0             | 0             | 0             | 0           | 0           | 0           | 0           | 0           | 0           | 0           | 0           | 0           | 0           | 1           | 0           | 0             | 0          | 0            | 0              |
|                             |            |               |               |               |               |             |             |             |             |             |             |             |             |             |             |             |             |               |            |              |                |
|                             |            |               |               |               |               |             |             |             |             |             |             |             |             |             |             |             |             |               |            |              |                |
| <b>effector</b>             | <b>Tir</b> | <b>VP1680</b> | <b>VP1683</b> | <b>VP1686</b> | <b>VP1698</b> | <b>VirA</b> | <b>VopA</b> | <b>VopF</b> | <b>VopS</b> | <b>XopD</b> | <b>YopE</b> | <b>YopH</b> | <b>YopJ</b> | <b>YopK</b> | <b>YopO</b> | <b>YopQ</b> | <b>YopT</b> | <b>cp0034</b> | <b>ibc</b> | <b>Orf31</b> | <b>vpa0450</b> |
| Pseudomonas syringae        | 0          | 0             | 0             | 0             | 0             | 0           | 0           | 0           | 0           | 0           | 0           | 0           | 0           | 0           | 0           | 0           | 0           | 0             | 0          | 0            | 0              |
| Acidovorax avenae           | 0          | 0             | 0             | 0             | 0             | 0           | 1           | 0           | 0           | 1           | 0           | 0           | 1           | 0           | 0           | 0           | 0           | 0             | 0          | 0            | 0              |
| Acidovorax citrulli         | 0          | 0             | 0             | 0             | 0             | 0           | 1           | 0           | 0           | 1           | 0           | 0           | 1           | 0           | 0           | 0           | 0           | 0             | 0          | 0            | 0              |
| Erwinia amylovora           | 0          | 0             | 0             | 0             | 0             | 0           | 0           | 0           | 0           | 0           | 0           | 1           | 0           | 0           | 0           | 0           | 0           | 0             | 0          | 0            | 0              |
| Erwinia pyrifoliae          | 0          | 0             | 0             | 0             | 0             | 0           | 1           | 0           | 0           | 0           | 0           | 1           | 0           | 0           | 0           | 0           | 0           | 0             | 0          | 0            | 0              |
| Ralstonia solanacearum      | 0          | 0             | 0             | 0             | 0             | 0           | 1           | 0           | 0           | 0           | 0           | 0           | 1           | 0           | 0           | 0           | 0           | 0             | 0          | 0            | 0              |
| Sinorhizobium fredii        | 0          | 0             | 0             | 0             | 0             | 0           | 0           | 0           | 0           | 0           | 0           | 0           | 0           | 0           | 0           | 0           | 0           | 0             | 0          | 0            | 0              |
| Xanthomonas campestris      | 0          | 0             | 0             | 0             | 0             | 0           | 1           | 0           | 0           | 1           | 0           | 0           | 1           | 0           | 1           | 0           | 0           | 0             | 0          | 0            | 0              |
| Bradyrhizobium japonicum    | 0          | 0             | 0             | 0             | 0             | 0           | 0           | 0           | 0           | 0           | 0           | 0           | 0           | 0           | 0           | 0           | 0           | 0             | 0          | 0            | 0              |
| Dickeya dadantii            | 0          | 0             | 0             | 0             | 0             | 0           | 0           | 0           | 0           | 0           | 0           | 0           | 0           | 0           | 0           | 0           | 0           | 0             | 0          | 0            | 0              |
| Dickeya zeae                | 0          | 0             | 0             | 0             | 0             | 0           | 0           | 0           | 0           | 0           | 0           | 0           | 0           | 0           | 0           | 0           | 0           | 0             | 0          | 0            | 0              |
| Erwinia tasmaniensis        | 0          | 0             | 0             | 0             | 0             | 0           | 0           | 0           | 0           | 0           | 0           | 1           | 0           | 0           | 0           | 0           | 0           | 0             | 0          | 0            | 0              |
| Herbaspirillum seropedicae  | 0          | 0             | 0             | 0             | 0             | 0           | 0           | 0           | 0           | 0           | 0           | 0           | 0           | 0           | 0           | 0           | 0           | 0             | 0          | 0            | 0              |
| Mesorhizobium loti          | 0          | 0             | 0             | 0             | 0             | 0           | 0           | 0           | 0           | 1           | 0           | 0           | 0           | 0           | 0           | 0           | 0           | 0             | 0          | 0            | 0              |
| Pectobacterium atrosepticum | 0          | 0             | 0             | 0             | 0             | 0           | 0           | 0           | 0           | 0           | 0           | 0           | 0           | 0           | 0           | 0           | 0           | 0             | 0          | 0            | 0              |
| Pectobacterium carotovorum  | 0          | 0             | 0             | 0             | 0             | 0           | 0           | 0           | 0           | 0           | 0           | 0           | 0           | 0           | 0           | 0           | 0           | 0             | 0          | 0            | 0              |
| Pseudomonas brassicacearum  | 0          | 0             | 0             | 0             | 0             | 0           | 0           | 0           | 0           | 0           | 0           | 0           | 0           | 0           | 0           | 0           | 0           | 0             | 0          | 0            | 0              |
| Pseudomonas fluorescens     | 0          | 0             | 0             | 0             | 0             | 0           | 0           | 0           | 0           | 0           | 0           | 0           | 0           | 0           | 0           | 0           | 0           | 0             | 0          | 0            | 0              |
| Rhizobium etli              | 0          | 0             | 0             | 0             | 0             | 0           | 0           | 0           | 0           | 1           | 0           | 0           | 0           | 0           | 0           | 0           | 0           | 0             | 0          | 0            | 0              |
| Xanthomonas axonopodis      | 0          | 0             | 0             | 0             | 0             | 0           | 0           | 0           | 0           | 0           | 0           | 0           | 0           | 0           | 1           | 0           | 0           | 0             | 0          | 0            | 0              |
| Xanthomonas oryzae          | 0          | 0             | 0             | 0             | 0             | 0           | 0           | 0           | 0           | 0           | 0           | 0           | 0           | 0           | 0           | 0           | 0           | 0             | 0          | 0            | 0              |
| Salmonella bongori          | 0          | 0             | 0             | 0             | 0             | 0           | 1           | 0           | 0           | 0           | 1           | 0           | 1           | 0           | 0           | 0           | 0           | 0             | 1          | 0            | 0              |
| Salmonella enterica         | 0          | 0             | 0             | 0             | 0             | 0           | 1           | 0           | 0           | 0           | 1           | 1           | 1           | 0           | 0           | 0           | 0           | 0             | 1          | 0            | 0              |
| Yersinia enterocolitica     | 0          | 0             | 0             | 0             | 0             | 0           | 1           | 0           | 0           | 0           | 1           | 1           | 1           | 1           | 1           | 1           | 1           | 0             | 0          | 0            | 0              |
| Yersinia pestis             | 0          | 0             | 0             | 0             | 0             | 0           | 1           | 0           | 0           | 0           | 1           | 1           | 1           | 1           | 1           | 1           | 1           | 0             | 0          | 0            | 0              |
| Yersinia pseudotuberculosis | 0          | 0             | 0             | 0             | 0             | 0           | 1           | 0           | 0           | 0           | 1           | 1           | 1           | 1           | 1           | 1           | 1           | 0             | 0          | 0            | 0              |

|                             |   |   |   |   |   |   |   |   |   |   |   |   |   |   |   |   |   |   |   |   |   |
|-----------------------------|---|---|---|---|---|---|---|---|---|---|---|---|---|---|---|---|---|---|---|---|---|
| Burkholderia ambifaria      | 0 | 0 | 0 | 0 | 0 | 0 | 0 | 0 | 0 | 0 | 0 | 0 | 0 | 0 | 0 | 0 | 0 | 0 | 0 | 0 | 0 |
| Burkholderia CCGE1001       | 0 | 0 | 0 | 0 | 0 | 0 | 0 | 0 | 0 | 0 | 0 | 0 | 0 | 0 | 0 | 0 | 0 | 0 | 0 | 0 | 0 |
| Burkholderia CCGE1003       | 0 | 0 | 0 | 0 | 0 | 0 | 0 | 0 | 0 | 0 | 0 | 0 | 0 | 0 | 0 | 0 | 0 | 0 | 0 | 0 | 0 |
| Burkholderia cenocepacia    | 0 | 0 | 0 | 0 | 0 | 0 | 0 | 0 | 0 | 0 | 0 | 0 | 0 | 0 | 0 | 0 | 0 | 0 | 0 | 0 | 0 |
| Burkholderia gladioli       | 0 | 0 | 0 | 0 | 0 | 0 | 0 | 0 | 0 | 0 | 0 | 0 | 0 | 0 | 0 | 0 | 0 | 0 | 0 | 0 | 0 |
| Burkholderia glumae         | 0 | 0 | 0 | 0 | 0 | 0 | 0 | 0 | 0 | 0 | 0 | 0 | 0 | 0 | 0 | 0 | 0 | 0 | 0 | 0 | 0 |
| Burkholderia mallei         | 0 | 0 | 0 | 0 | 0 | 0 | 0 | 0 | 0 | 0 | 0 | 0 | 0 | 0 | 0 | 0 | 0 | 0 | 0 | 0 | 0 |
| Burkholderia multivorans    | 0 | 0 | 0 | 0 | 0 | 0 | 0 | 0 | 0 | 0 | 0 | 0 | 0 | 0 | 0 | 0 | 0 | 0 | 0 | 0 | 0 |
| Burkholderia pseudomallei   | 0 | 0 | 0 | 0 | 0 | 0 | 0 | 0 | 0 | 0 | 0 | 0 | 0 | 0 | 0 | 0 | 0 | 0 | 0 | 0 | 0 |
| Burkholderia rhizoxinica    | 0 | 0 | 0 | 0 | 0 | 0 | 0 | 0 | 0 | 0 | 0 | 0 | 0 | 0 | 0 | 0 | 0 | 0 | 0 | 0 | 0 |
| Burkholderia thailandensis  | 0 | 0 | 0 | 0 | 0 | 0 | 0 | 0 | 0 | 0 | 0 | 0 | 0 | 0 | 0 | 0 | 0 | 0 | 0 | 0 | 0 |
| Burkholderia vietnamiensis  | 0 | 0 | 0 | 0 | 0 | 0 | 0 | 0 | 0 | 0 | 0 | 0 | 0 | 0 | 0 | 0 | 0 | 0 | 0 | 0 | 0 |
| Chlamydophila abortus       | 0 | 0 | 0 | 0 | 0 | 0 | 0 | 0 | 0 | 0 | 0 | 0 | 0 | 0 | 0 | 0 | 0 | 1 | 0 | 0 | 0 |
| Chlamydophila caviae        | 0 | 0 | 0 | 0 | 0 | 0 | 0 | 0 | 0 | 0 | 0 | 0 | 0 | 0 | 0 | 0 | 0 | 1 | 0 | 0 | 0 |
| Chlamydophila felis         | 0 | 0 | 0 | 0 | 0 | 0 | 0 | 0 | 0 | 0 | 0 | 0 | 0 | 0 | 0 | 0 | 0 | 1 | 0 | 0 | 0 |
| Chlamydophila pecorum       | 0 | 0 | 0 | 0 | 0 | 0 | 0 | 0 | 0 | 0 | 0 | 0 | 0 | 0 | 0 | 0 | 0 | 1 | 0 | 0 | 0 |
| Chlamydophila pneumoniae    | 0 | 0 | 0 | 0 | 0 | 0 | 0 | 0 | 0 | 0 | 0 | 0 | 0 | 0 | 0 | 0 | 0 | 1 | 0 | 0 | 0 |
| Chlamydophila psittaci      | 0 | 0 | 0 | 0 | 0 | 0 | 0 | 0 | 0 | 0 | 0 | 0 | 0 | 0 | 0 | 0 | 0 | 1 | 0 | 0 | 0 |
| Pseudomonas aeruginosa      | 0 | 0 | 0 | 0 | 0 | 0 | 0 | 0 | 0 | 0 | 0 | 0 | 0 | 0 | 0 | 0 | 0 | 0 | 0 | 0 | 0 |
| Shigella boydii             | 0 | 0 | 0 | 0 | 0 | 1 | 0 | 0 | 0 | 0 | 0 | 0 | 0 | 0 | 0 | 0 | 0 | 0 | 1 | 1 | 0 |
| Shigella dysenteriae        | 0 | 0 | 0 | 0 | 0 | 1 | 0 | 0 | 0 | 0 | 0 | 0 | 0 | 0 | 0 | 0 | 0 | 0 | 1 | 1 | 0 |
| Shigella flexneri           | 0 | 0 | 0 | 0 | 0 | 1 | 0 | 0 | 0 | 0 | 0 | 0 | 0 | 0 | 0 | 0 | 0 | 0 | 1 | 1 | 0 |
| Shigella sonnei             | 0 | 0 | 0 | 0 | 0 | 1 | 0 | 0 | 0 | 0 | 0 | 0 | 0 | 0 | 0 | 0 | 0 | 0 | 1 | 1 | 0 |
| Photobacterium luminescens  | 0 | 0 | 1 | 0 | 0 | 0 | 0 | 0 | 0 | 0 | 0 | 0 | 0 | 0 | 0 | 0 | 1 | 0 | 0 | 0 | 1 |
| Edwardsiella ictaluri       | 0 | 0 | 0 | 0 | 0 | 0 | 0 | 0 | 0 | 0 | 0 | 0 | 0 | 0 | 0 | 0 | 0 | 0 | 0 | 0 | 0 |
| Shewanella baltica          | 0 | 0 | 0 | 0 | 0 | 0 | 0 | 0 | 0 | 0 | 0 | 0 | 0 | 0 | 0 | 0 | 0 | 0 | 0 | 0 | 0 |
| Waddlia chondrophila        | 0 | 0 | 0 | 0 | 0 | 0 | 0 | 0 | 0 | 0 | 0 | 1 | 0 | 0 | 0 | 0 | 0 | 0 | 1 | 0 | 0 |
| Parachlamydia acanthamoebae | 0 | 0 | 0 | 0 | 0 | 0 | 0 | 0 | 0 | 0 | 0 | 0 | 0 | 0 | 0 | 0 | 0 | 1 | 0 | 0 | 0 |
| Escherichia coli            | 1 | 0 | 0 | 0 | 0 | 1 | 0 | 0 | 0 | 0 | 0 | 0 | 0 | 0 | 0 | 0 | 0 | 0 | 1 | 1 | 0 |
| Marinomonas mediterranea    | 0 | 0 | 0 | 0 | 0 | 0 | 1 | 0 | 0 | 0 | 0 | 0 | 1 | 0 | 0 | 0 | 0 | 0 | 0 | 0 | 0 |
| Vibrio parahaemolyticus     | 0 | 1 | 1 | 1 | 1 | 0 | 1 | 1 | 1 | 0 | 0 | 0 | 1 | 0 | 0 | 0 | 0 | 0 | 1 | 0 | 1 |
| Aeromonas salmonicida       | 0 | 0 | 1 | 1 | 0 | 0 | 0 | 0 | 1 | 0 | 1 | 1 | 0 | 0 | 1 | 0 | 0 | 0 | 0 | 0 | 1 |

|                           |   |   |   |   |   |   |   |   |   |   |   |   |   |   |   |   |   |   |   |   |   |
|---------------------------|---|---|---|---|---|---|---|---|---|---|---|---|---|---|---|---|---|---|---|---|---|
| Bordetella bronchiseptica | 0 | 0 | 0 | 0 | 0 | 0 | 0 | 0 | 0 | 0 | 0 | 0 | 0 | 0 | 0 | 0 | 0 | 0 | 0 | 0 | 0 |
| Bordetella parapertussis  | 0 | 0 | 0 | 0 | 0 | 0 | 0 | 0 | 0 | 0 | 0 | 0 | 0 | 0 | 0 | 0 | 0 | 0 | 0 | 0 | 0 |
| Bordetella pertussis      | 0 | 0 | 0 | 0 | 0 | 0 | 0 | 0 | 0 | 0 | 0 | 0 | 0 | 0 | 0 | 0 | 0 | 0 | 0 | 0 | 0 |
| Candidatus Hamiltonella   | 0 | 0 | 0 | 0 | 0 | 0 | 0 | 0 | 0 | 0 | 0 | 1 | 0 | 0 | 0 | 0 | 1 | 0 | 1 | 0 | 0 |
| Chromobacterium violaceum | 0 | 0 | 0 | 0 | 0 | 0 | 0 | 0 | 0 | 0 | 0 | 1 | 0 | 0 | 0 | 0 | 0 | 0 | 0 | 0 | 0 |
| Citrobacter rodentium     | 1 | 0 | 0 | 0 | 0 | 1 | 0 | 0 | 0 | 0 | 0 | 0 | 0 | 0 | 0 | 0 | 0 | 0 | 1 | 1 | 0 |
| Cupriavidus taiwanensis   | 0 | 0 | 0 | 0 | 0 | 0 | 0 | 0 | 0 | 0 | 0 | 0 | 0 | 0 | 0 | 0 | 0 | 0 | 0 | 0 | 0 |
| Desulfovibrio vulgaris    | 0 | 0 | 0 | 0 | 0 | 0 | 0 | 0 | 0 | 0 | 0 | 0 | 0 | 0 | 0 | 0 | 0 | 0 | 0 | 0 | 0 |
| Edwardsiella tarda        | 0 | 0 | 0 | 0 | 0 | 0 | 0 | 0 | 0 | 0 | 0 | 0 | 0 | 0 | 0 | 0 | 0 | 0 | 0 | 0 | 0 |
| Geobacter bemidjiensis    | 0 | 0 | 0 | 0 | 0 | 0 | 0 | 0 | 0 | 0 | 0 | 0 | 0 | 0 | 0 | 0 | 0 | 0 | 0 | 0 | 0 |
| Geobacter M21             | 0 | 0 | 0 | 0 | 0 | 0 | 0 | 0 | 0 | 0 | 0 | 0 | 0 | 0 | 0 | 0 | 0 | 0 | 0 | 0 | 0 |
| Geobacter metallireducens | 0 | 0 | 0 | 0 | 0 | 0 | 0 | 0 | 0 | 0 | 0 | 0 | 0 | 0 | 0 | 0 | 0 | 0 | 0 | 0 | 0 |
| Hahella chejuensis        | 0 | 0 | 0 | 0 | 0 | 0 | 0 | 0 | 0 | 0 | 0 | 0 | 0 | 0 | 0 | 0 | 1 | 0 | 0 | 0 | 0 |
| Hyphomicrobium MCI        | 0 | 0 | 0 | 0 | 0 | 0 | 0 | 0 | 0 | 0 | 0 | 0 | 0 | 0 | 0 | 0 | 0 | 0 | 0 | 0 | 0 |
| Lawsonia intracellularis  | 0 | 0 | 0 | 0 | 0 | 0 | 0 | 0 | 0 | 0 | 0 | 0 | 0 | 0 | 0 | 0 | 0 | 0 | 0 | 0 | 0 |
| Photorhabdus asymbiotica  | 0 | 0 | 0 | 1 | 0 | 0 | 0 | 0 | 1 | 0 | 0 | 0 | 0 | 0 | 0 | 0 | 1 | 0 | 0 | 0 | 0 |
| Proteus mirabilis         | 0 | 0 | 0 | 0 | 0 | 0 | 0 | 0 | 0 | 0 | 0 | 1 | 0 | 0 | 0 | 0 | 0 | 0 | 0 | 0 | 0 |
| Pseudomonas mendocina     | 0 | 0 | 0 | 0 | 0 | 0 | 0 | 0 | 0 | 0 | 0 | 0 | 0 | 0 | 0 | 0 | 0 | 0 | 0 | 0 | 0 |
| Ramlibacter tataouinensis | 0 | 0 | 0 | 0 | 0 | 0 | 0 | 0 | 0 | 0 | 0 | 0 | 0 | 0 | 0 | 0 | 0 | 0 | 0 | 0 | 0 |
| Selenomonas sputigena     | 0 | 0 | 0 | 0 | 0 | 0 | 0 | 0 | 0 | 0 | 0 | 0 | 0 | 0 | 0 | 0 | 0 | 0 | 0 | 0 | 0 |
| Shewanella violacea       | 0 | 0 | 0 | 0 | 0 | 0 | 0 | 0 | 0 | 0 | 0 | 0 | 0 | 0 | 0 | 0 | 0 | 0 | 0 | 0 | 0 |
| Simkania negevensis       | 0 | 0 | 0 | 0 | 0 | 0 | 0 | 0 | 0 | 0 | 0 | 0 | 0 | 0 | 0 | 0 | 0 | 1 | 0 | 0 | 0 |
| Sodalis glossinidius      | 0 | 0 | 0 | 0 | 0 | 0 | 0 | 0 | 0 | 0 | 0 | 0 | 0 | 0 | 0 | 0 | 0 | 0 | 0 | 0 | 0 |
| Variovorax paradoxus      | 0 | 0 | 0 | 0 | 0 | 0 | 0 | 0 | 0 | 0 | 0 | 0 | 0 | 0 | 0 | 0 | 0 | 0 | 0 | 0 | 0 |
| Vibrio Ex25               | 0 | 0 | 0 | 0 | 0 | 0 | 0 | 0 | 0 | 0 | 0 | 0 | 0 | 0 | 0 | 0 | 0 | 0 | 0 | 0 | 0 |
| Vibrio harveyi            | 0 | 1 | 0 | 1 | 1 | 0 | 0 | 0 | 1 | 0 | 0 | 0 | 0 | 0 | 0 | 0 | 1 | 0 | 0 | 0 | 0 |

**Supplementary table 4**

| Effector | Occurrence |        | Effector | Occurrence |        |
|----------|------------|--------|----------|------------|--------|
|          | Species    | Genera |          | Species    | Genera |
| PipB     | 40 (93)    | 23     | YopE     | 6          | 3      |
| SspH1    | 21         | 13     | YopO     | 8 (10)     | 3      |
| SlrP     | 24 (17)    | 11     | AvrPphB  | 5          | 4      |
| IpaB     | 15         | 6      | ExoS     | 8          | 5      |
| SipB     | 15         | 8      | GALA     | 5 (3)      | 3      |
| SopA     | 15         | 7      | IpaH     | 5          | 2      |
| AvrBsT   | 14         | 9      | LscZ     | 5          | 4      |
| YopH     | 12         | 8      | SopD     | 6          | 4      |
| VopA     | 12         | 8      | XopD     | 6          | 4      |
| YopJ     | 11         | 7 (3)  | IncB     | 4          | 1      |
| OspG     | 10         | 6      | VP1686   | 5          | 3      |
| SptP     | 12         | 6      | VopS     | 4          | 3      |
| SseJ     | 11         | 8(1)   | BB4228   | 4          | 1      |
| AvrA     | 10         | 5(3)   | BPSS1516 | 3          | 2      |
| ExoY     | 9          | 6      | BPSS1539 | 3          | 1      |
| OspF     | 10         | 5      | ExoU     | 3          | 1      |
| Cp0034   | 10         | 4      | NleB     | 3          | 3      |
| Ibe      | 10         | 6      | VP1683   | 4          | 3      |
| BopA     | 10         | 3      | YopK     | 3          | 1      |
| ExoT     | 8          | 6      | YopQ     | 3          | 1      |
| IpgD     | 9          | 4      | vpa0450  | 3          | 3      |
| LopT     | 8          | 5      | EspB     | 2          | 2      |
| OspC3    | 8          | 5      | EspD     | 2          | 2      |
| SopB     | 9          | 4      | EspF     | 2          | 2      |
| YopT     | 8          | 5      | EspH     | 2          | 2      |
| HopptoD2 | 7          | 7 (1)  | EspZ     | 2          | 2      |
| HopptoN  | 7          | 6 (1)  | SifA     | 2          | 2      |
| IcsB     | 7          | 2      | SpiC     | 2          | 2      |
| IpaA     | 7          | 3      | Tir      | 2          | 2      |
| IpaC     | 7          | 3      | VP1680   | 3          | 1      |
| SipA     | 7          | 3      | VP1698   | 3          | 1      |
| SipC     | 7          | 3      | AexT     | 4          | 2      |
| VirA     | 6          | 3      | AvrPtoB  |            |        |
| orf31    | 7          | 3      | IncA     |            |        |
| BopE     | 6          | 3      | IncD     |            |        |
| EspG     | 6          | 3      | IncE     |            |        |
| Ipgb     | 6          | 3      | IncF     |            |        |
| MAP      | 6          | 3      | IncG     |            |        |
| PopP1    | 9          | 5 (1)  | SseF     |            |        |
| SopE     | 6          | 3      | SseG     |            |        |
| SseL     | 6          | 4      | TccP2    |            |        |
| TarP     | 6          | 1      | VopF     |            |        |
